# Supplementary material for: Identification of strong candidate genes for backfat and intramuscular fatty acid composition in three crosses based on the Iberian pig
Source: PubMed Central journal article supplement (PMC7435270; doi:10.1038/s41598-020-70894-2), 2020-08-18

# Identification of strong candidate genes for backfat and intramuscular fatty acid composition in three crosses based on the Iberian pig

Daniel Crespo-Piazuelo<sup>1,2,\*</sup>, Lourdes Criado-Mesas<sup>1</sup>, Manuel Revilla<sup>1,2</sup>, Anna Castelló<sup>1,2</sup>, José L. Noguera<sup>3</sup>, Ana I. Fernández<sup>4</sup>, Maria Ballester<sup>5</sup> and Josep M. Folch<sup>1,2</sup>

<sup>1</sup> Plant and Animal Genomics, Centre for Research in Agricultural Genomics (CRAG), CSIC-IRTA-UAB-UB Consortium, 08193 Bellaterra, Spain

<sup>2</sup> Departament de Ciència Animal i dels Aliments, Facultat de Veterinària, Universitat Autònoma de Barcelona (UAB), 08193 Bellaterra, Spain

<sup>3</sup> Genètica i Millora Animal, Institut de Recerca i Tecnologia Agroalimentàries (IRTA), 25198 Lleida, Spain

<sup>4</sup> Departamento de Mejora Genética Animal, Instituto Nacional de Investigación y Tecnología Agraria y Alimentaria (INIA), 28040 Madrid, Spain

<sup>5</sup> Departament de Genètica i Millora Animal, Institut de Recerca i Tecnologia Agroalimentàries (IRTA), 08140 Caldes de Montbui, Spain

\*E-mail: [daniel.crespo@cragenomica.es](mailto:daniel.crespo@cragenomica.es)

**Supplementary Information S1.** Quantile-quantile (Q-Q) plot of the association analysis between the 18 traits in backfat (BF) or *longissimus dorsi* muscle (LD) with significant SNPs. Trait and tissue are specified on the title of each figure. Red and blue lines indicate those SNPs that are below the genome-wide significance threshold ( $FDR \leq 0.05$  and  $FDR \leq 0.1$ , respectively). Genomic inflation factor ( $\lambda$ ) is indicated in the legend.

# C14:0 in BF

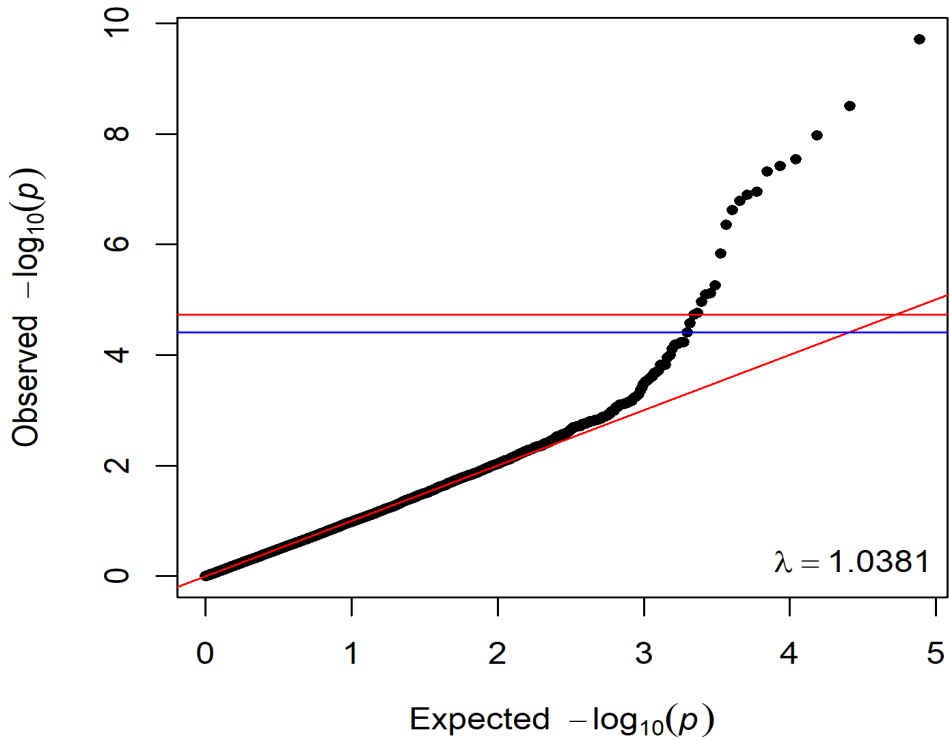

### C16:0 in BF

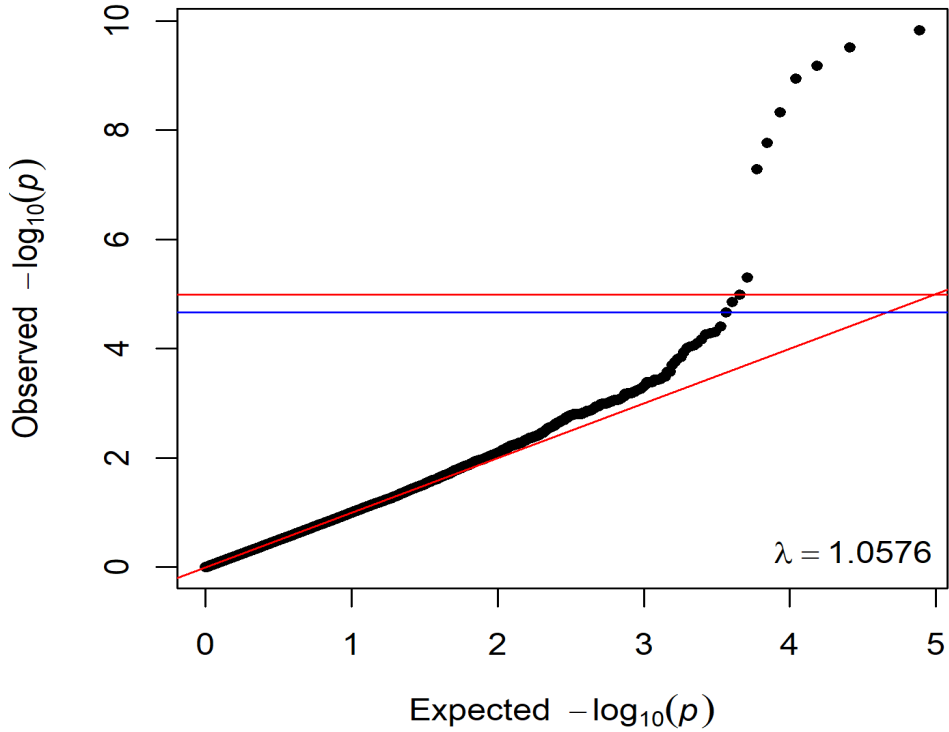

# C16:1(n-7) in BF

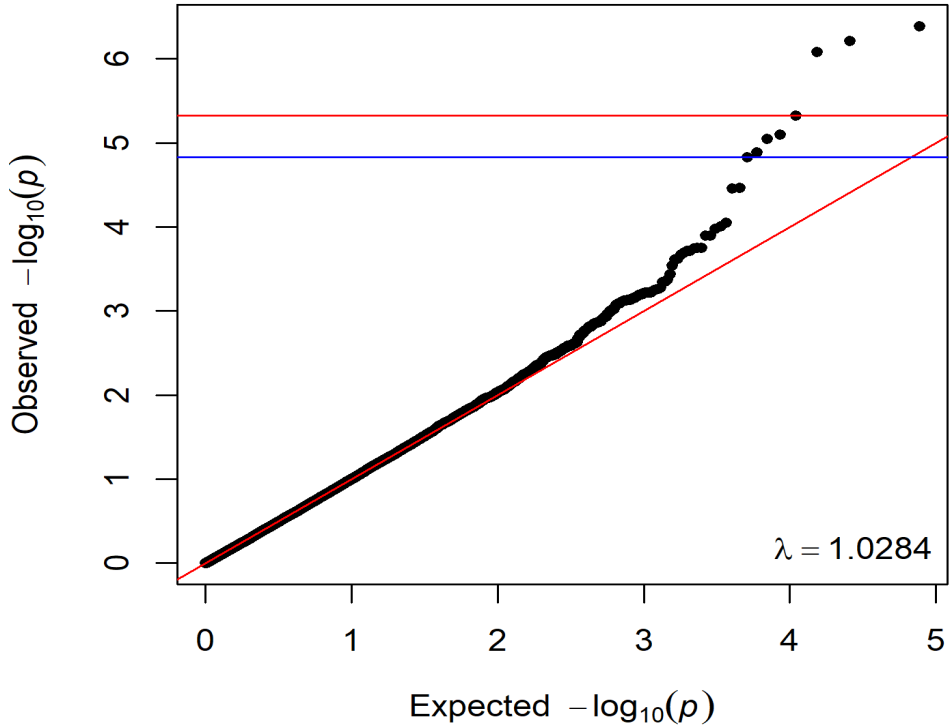

### C16:1(n-9) in BF

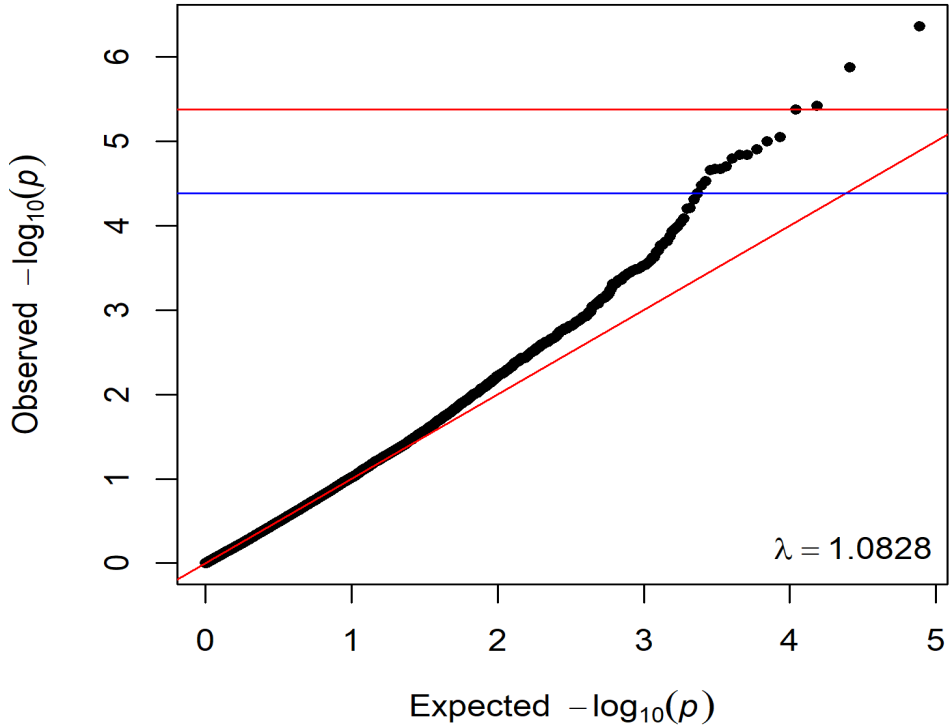

### C18:1(n-9) in BF

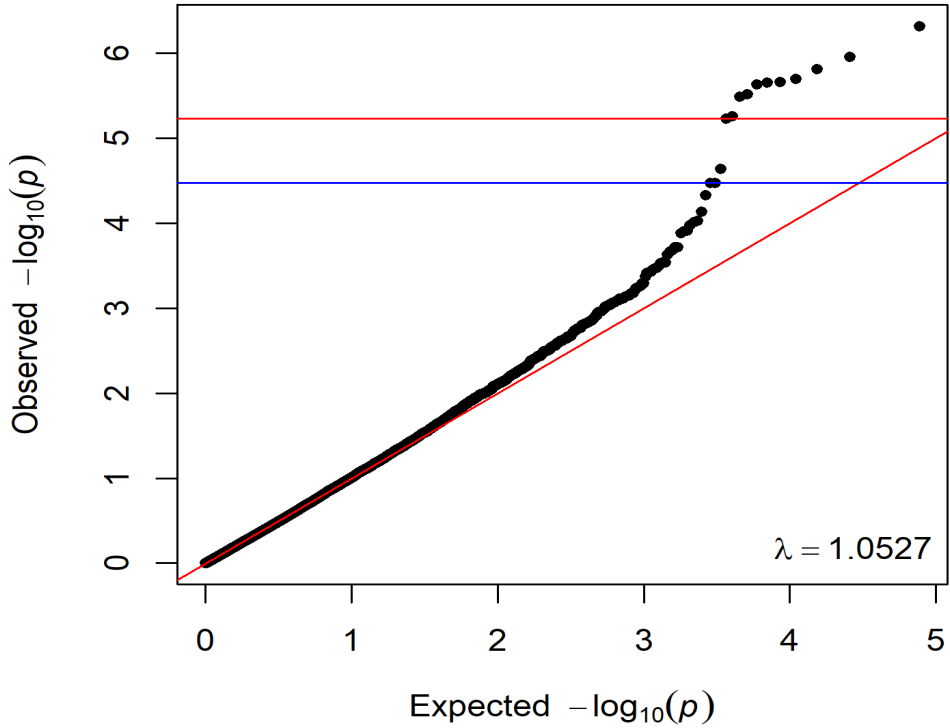

### C18:2(n-6) in BF

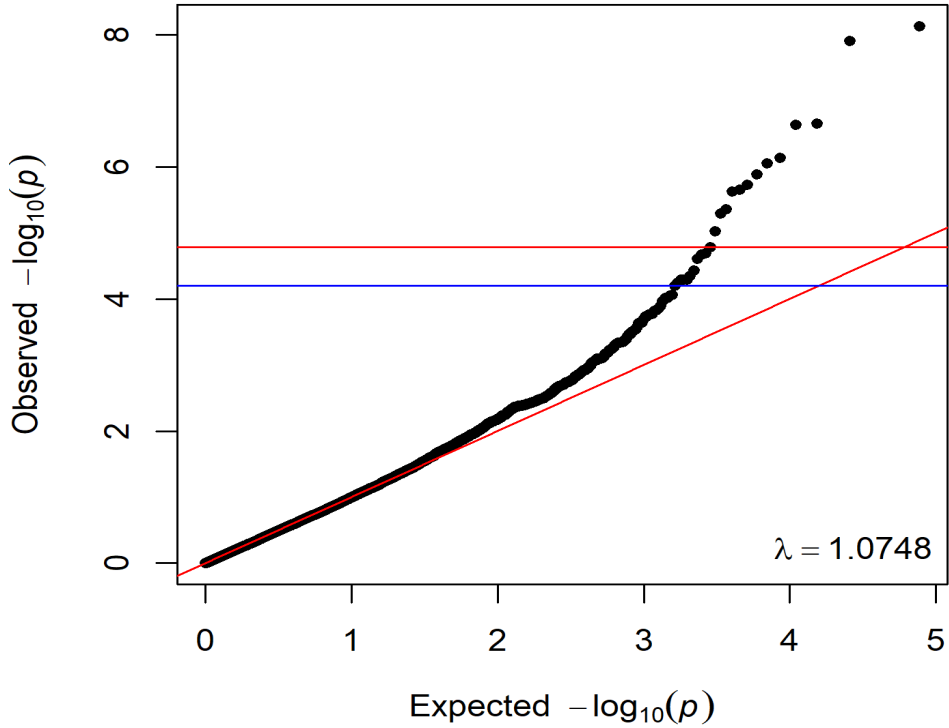

### C20:1(n-9)/C20:0 in BF

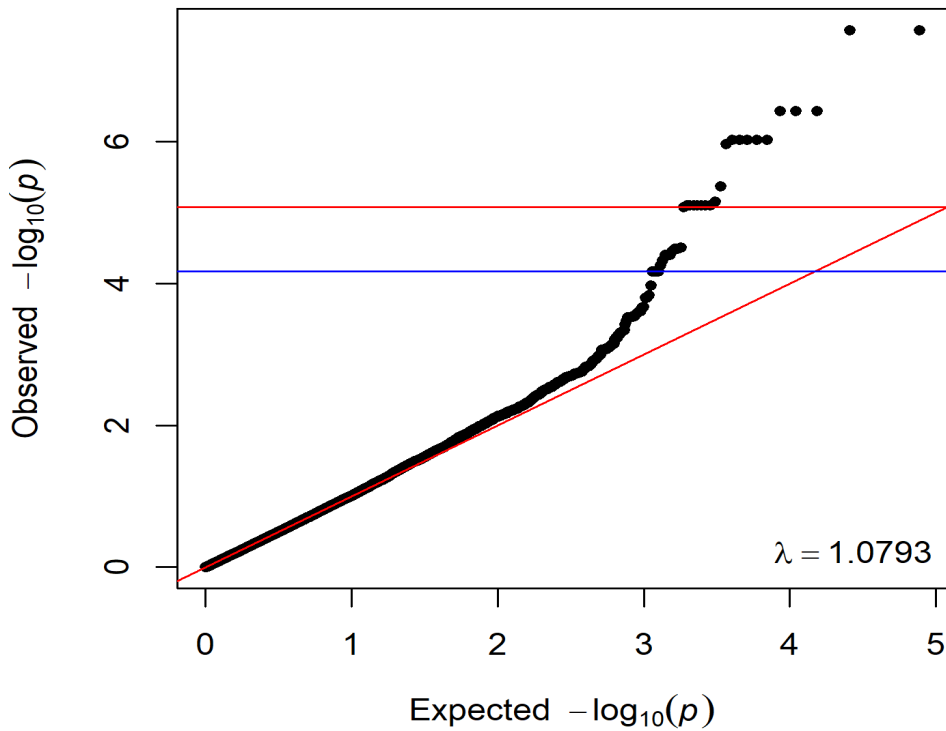



### C20:3(n-6) in BF

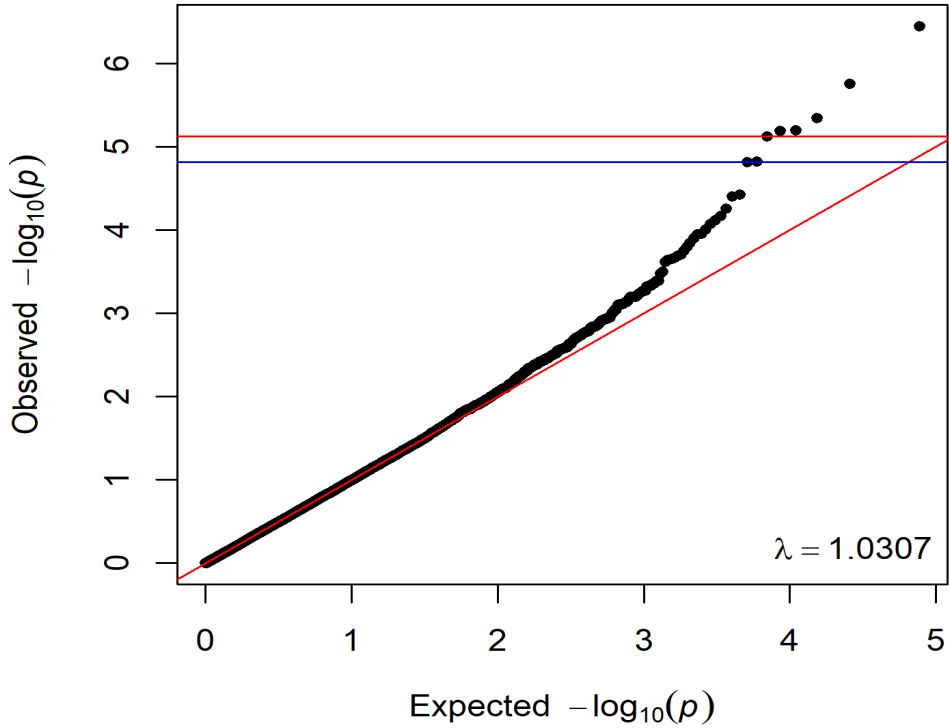

# MUFA in BF

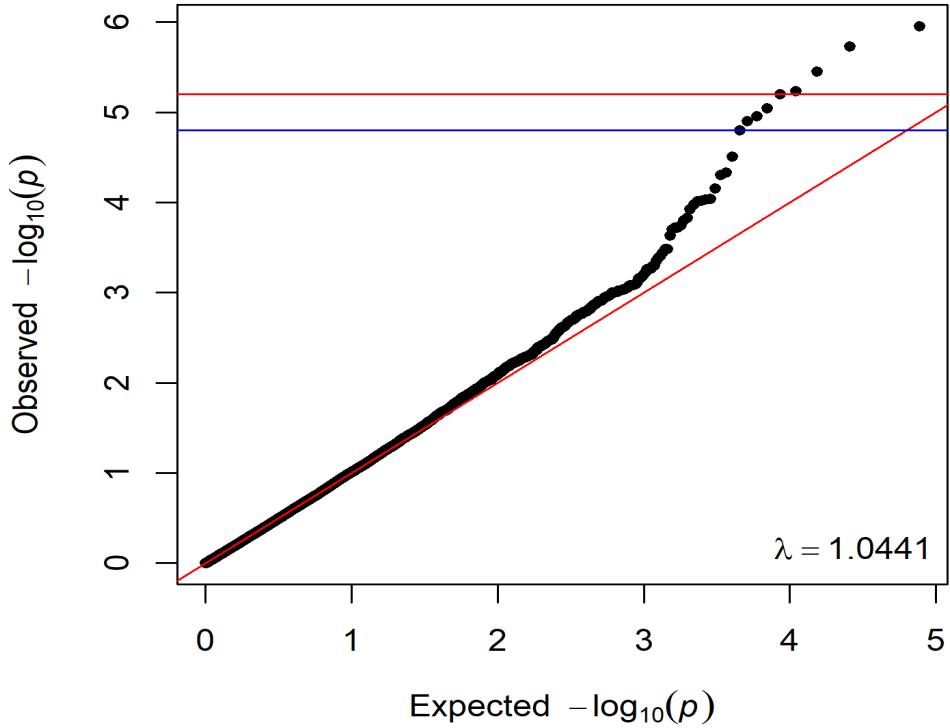

# MUFA/PUFA in BF

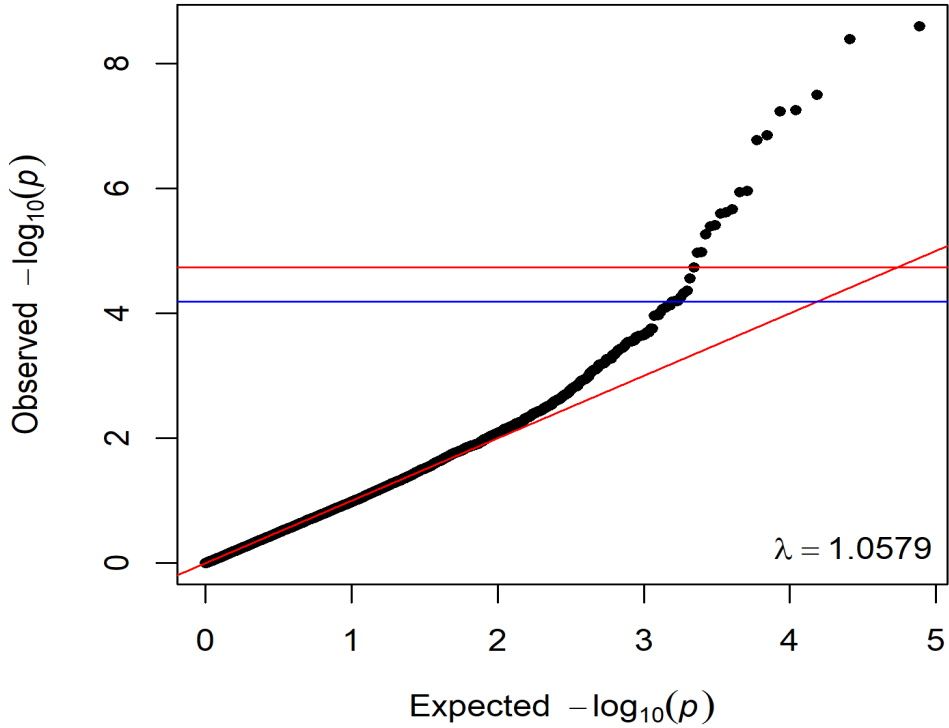

# PUFA in BF

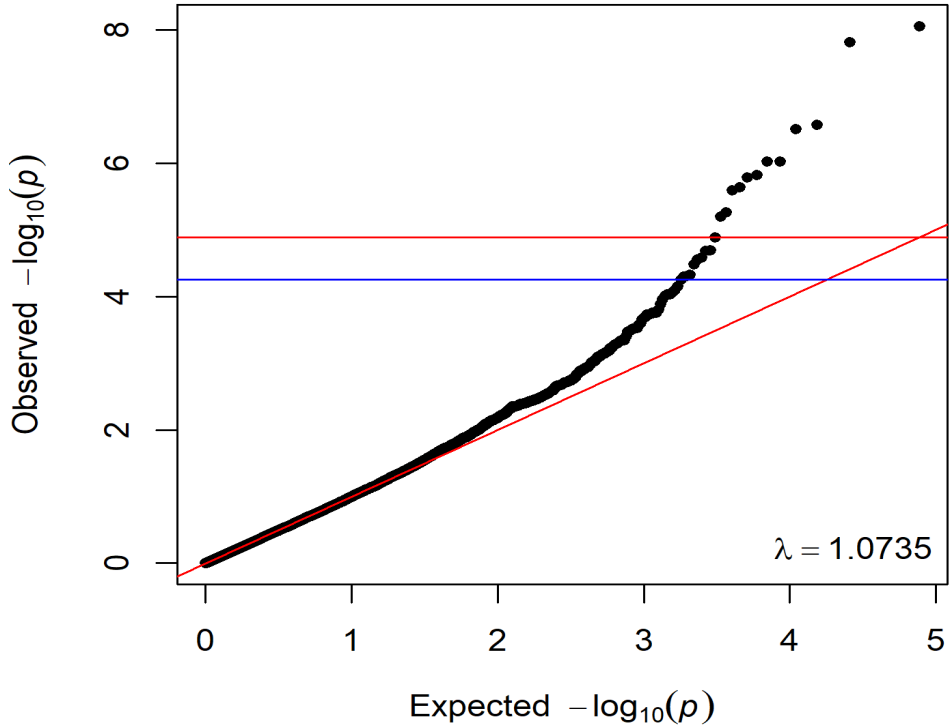

# PUFA/SFA in BF

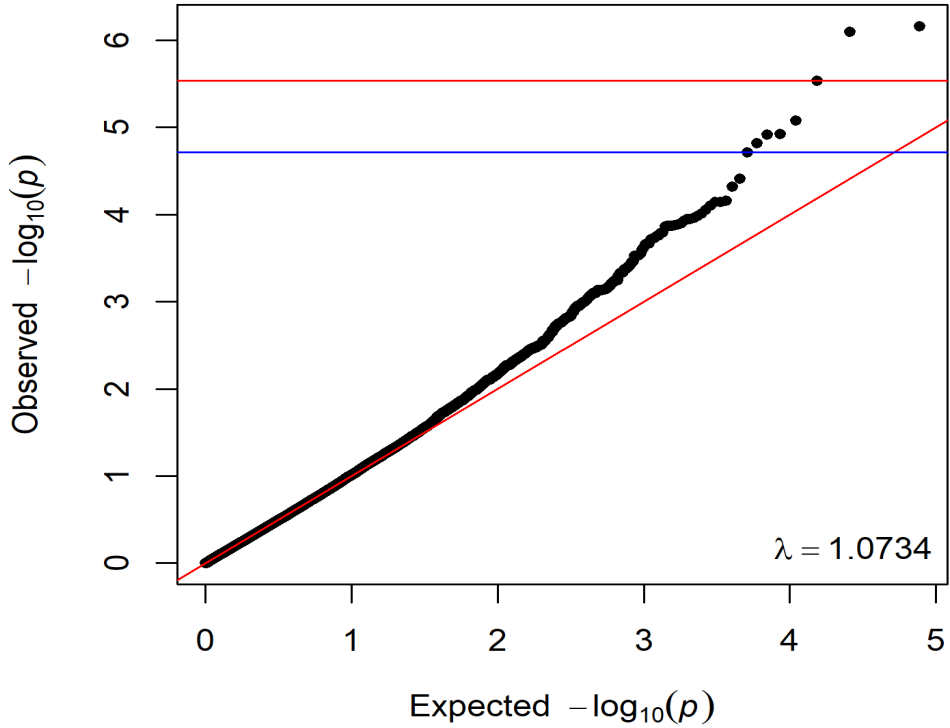

# C18:0 in LD

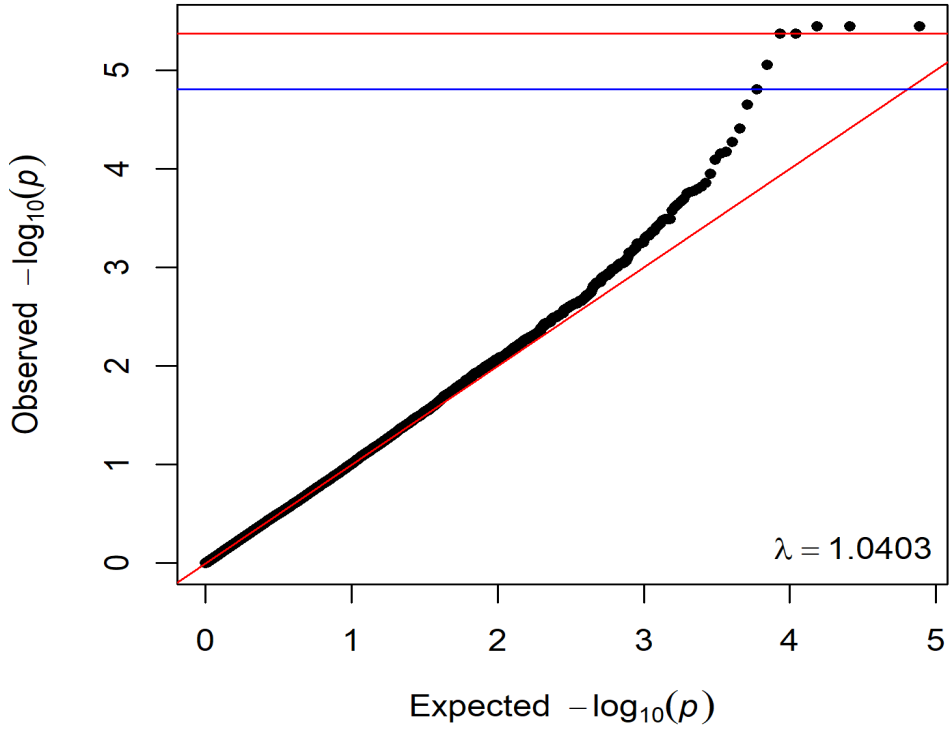

### C18:1(n-9)/C18:0 in LD

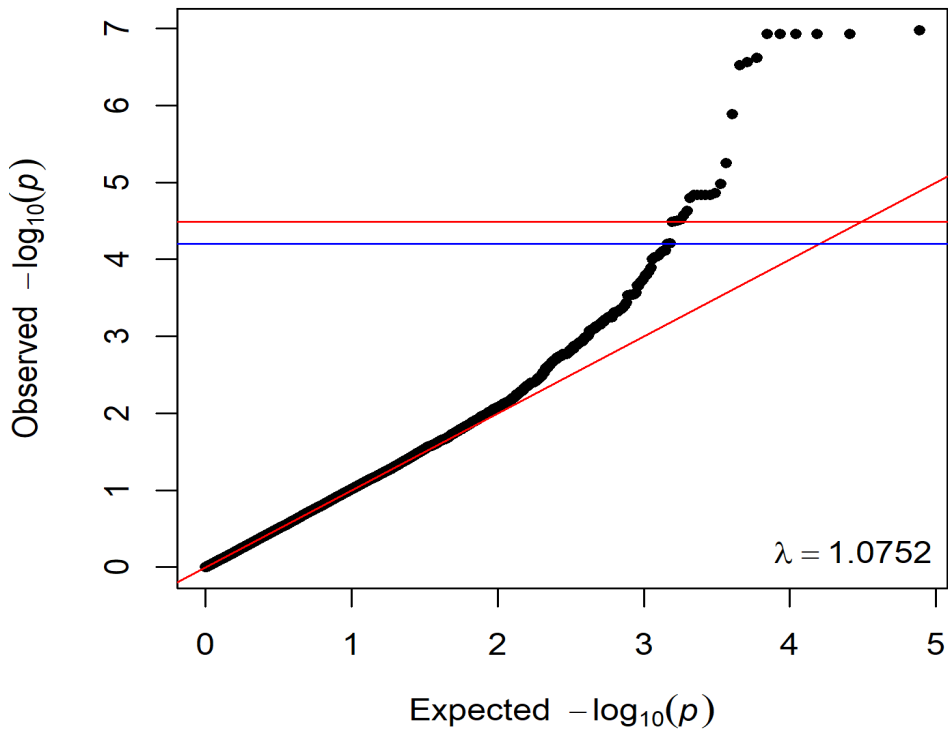

# C20:0 in LD

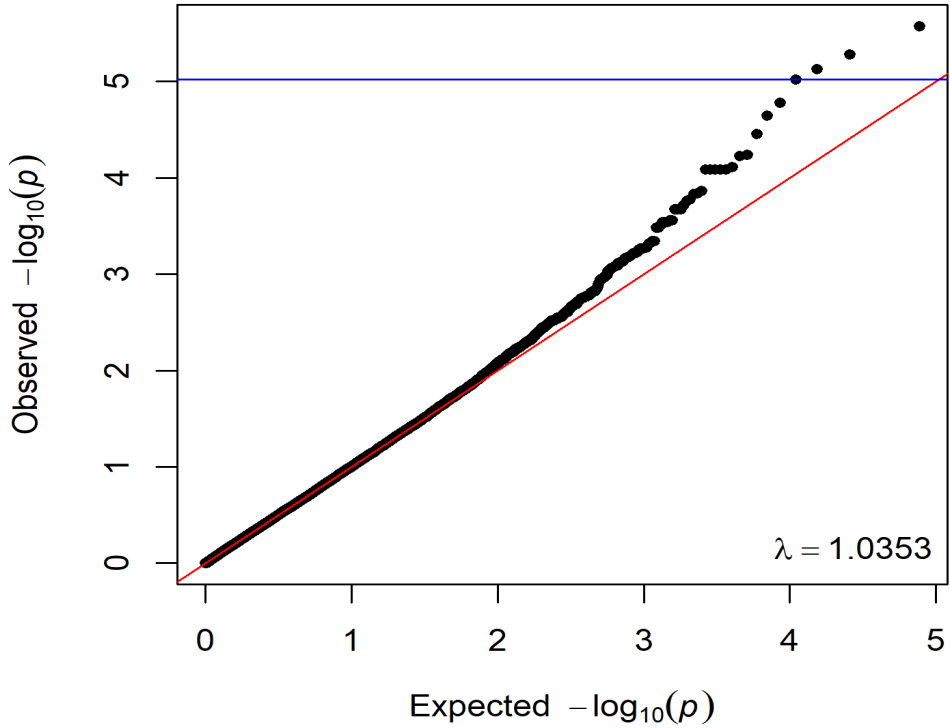



### C20:3(n-3) in LD

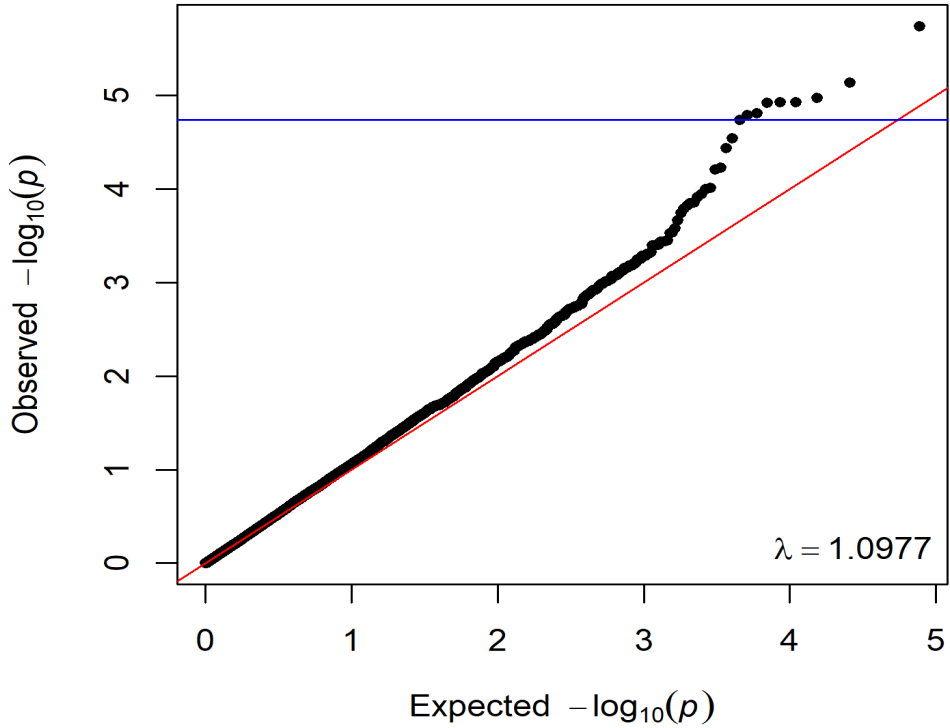

### C20:4(n-6)/C20:3(n-6) in LD

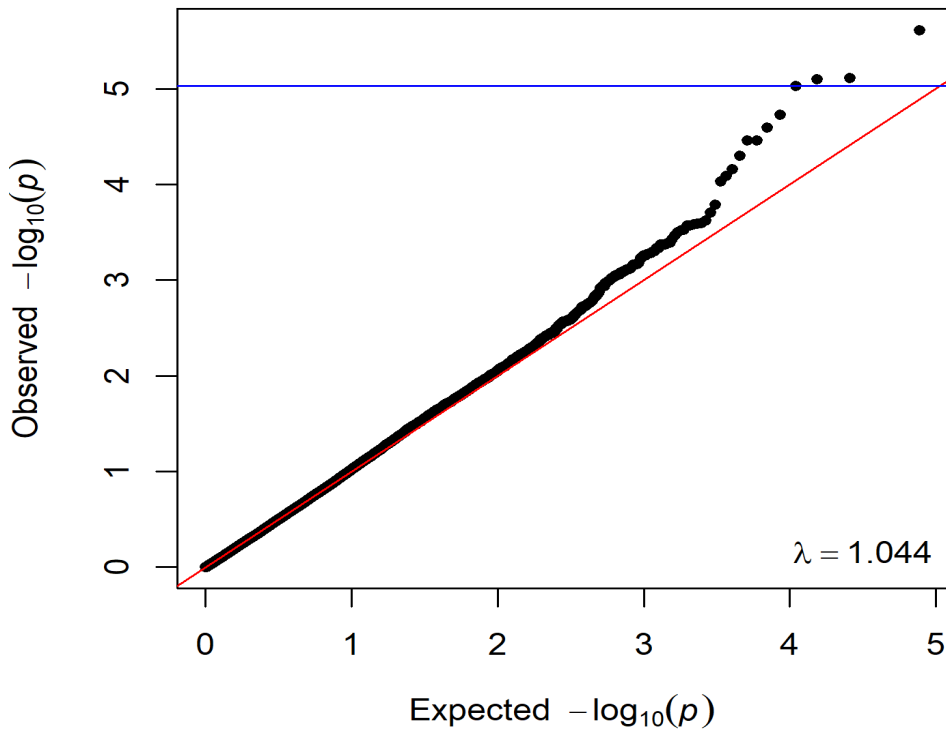

# MUFA/SFA in LD

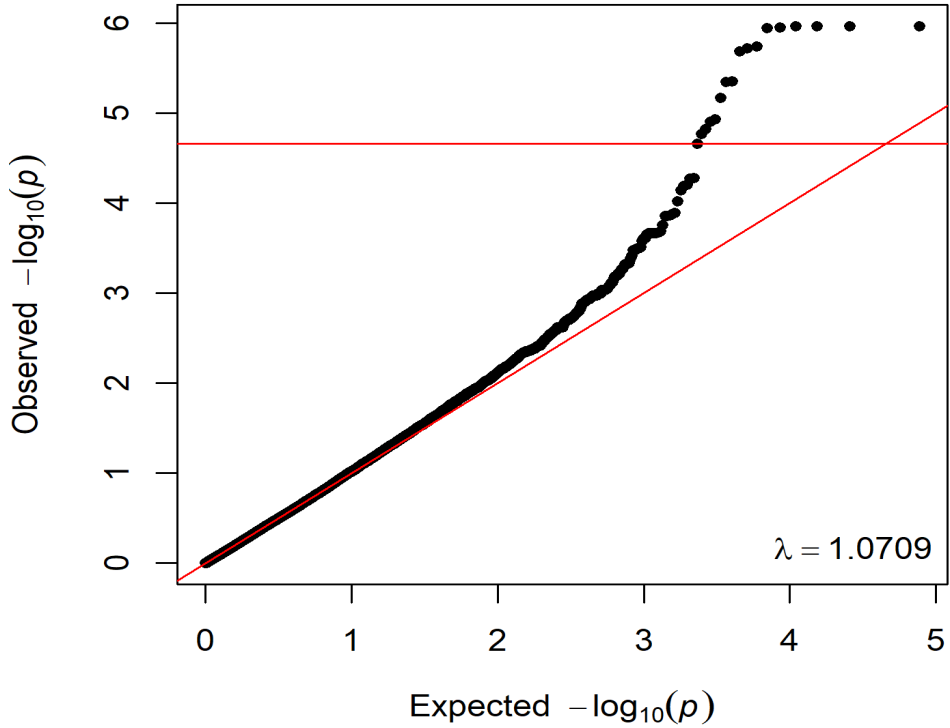

Supplement: 41598_2020_70894_MOESM6_ESM.pdf [file 41598_2020_70894_MOESM6_ESM.pdf]
